# Supplementary material
Source: PubMed Central journal article supplement (PMC8426616)
Supplement: mmc1.pdf [file mmc1.pdf]

# Investigation of Structural Analogs of Hydroxychloroquine for SARS-CoV-2 Main Protease (Mpro): A Computational Drug Discovery Study

*Saima Reyaz<sup>1#</sup>, Alvea Tasneem<sup>1#</sup>, Gyan Prakash Rai<sup>1#</sup>,  
and Hridoy R. Bairagya<sup>2\*</sup>*

*<sup>1</sup>Department of Computer Science, Jamia Millia Islamia, New Delhi-110025, India*

*<sup>2</sup>Department of Biophysics, All India Institute of Medical Sciences, New Delhi-110029, India*

**\* Corresponding Author:**

Dr. Hridoy Ranjan Bairagya.

Tel: +91-8277145815

Email: [hbairagya@gmail.com](mailto:hbairagya@gmail.com)

**#Authors (SR, AT, and GPR) contributed equally to this manuscript and shared first authorship.**

## SUPPLEMENTARY TABLES

**Table S1.** List of ligand-free crystal structures of Main Protease (Mpro) of SARS-CoV-2 and their different structural parameters.

| S. No. | PDB ID                       | Classification       | Method       | Resolution<br>(Å) | R-value<br>free/<br>R-value<br>work | SPACE<br>GROUP                                 | Entities/<br>Chains/<br>Sequence<br>length | Refinement<br>Methods | Unit Cell                                           |                                                  | References |
|--------|------------------------------|----------------------|--------------|-------------------|-------------------------------------|------------------------------------------------|--------------------------------------------|-----------------------|-----------------------------------------------------|--------------------------------------------------|------------|
|        |                              |                      |              |                   |                                     |                                                |                                            |                       | Length<br>(Å)                                       | Angle (°)                                        |            |
| 1      | <b>6YB7**<br/>(Template)</b> | <b>Viral Protein</b> | <b>X-ray</b> | <b>1.25</b>       | <b>0.192/0.171</b>                  | <b>C 1 2 1</b>                                 | <b>1ab/A/306</b>                           | BUSTER                | <b>a=112.42</b><br><b>b=52.79</b><br><b>c=44.61</b> | <b>α=90.0</b><br><b>β=103.0</b><br><b>γ=90.0</b> | [1]        |
| 2      | 6Y84                         | Viral Protein        | X-ray        | 1.39              | 0.200/0.178                         | C 1 2 1                                        | 1ab/A/306                                  | BUSTER                | a=112.81<br>b=52.94<br>c=44.63                      | α=90.0<br>β=103.1<br>γ=90.0                      | [2]        |
| 3      | 7ALH                         | Viral Protein        | X-ray        | 1.65              | 0.189/0.165                         | C 1 2 1                                        | Mpro/A/306                                 | PHENIX                | a=115.21<br>b=54.18<br>c=44.78                      | α=90.0<br>β=101.17<br>γ=90.0                     | [3]        |
| 4      | 7ALI                         | Viral Protein        | X-ray        | 1.65              | 0.217/0.189                         | C 1 2 1                                        | Mpro/A/306                                 | PHENIX                | a=44.77<br>b=53.69<br>c=114.55                      | α=90.0<br>β=101.17<br>γ=90.0                     | [4]        |
| 5      | 7BRO                         | Viral Protein        | X-ray        | 2.00              | 0.259/0.226                         | C 1 2 1                                        | 3-Clpro /A/307                             | PHENIX                | a=113.43<br>b=54.25<br>c=44.95                      | α=90.0<br>β=100.67<br>γ=90.0                     | [5]        |
| 6      | 7C2Y                         | Viral Protein        | X-ray        | 1.91              | 0.262/0.220                         | P 2 <sub>1</sub> 2 <sub>1</sub> 2 <sub>1</sub> | 3-Clpro /A/298                             | PHENIX                | a=67.88<br>b=102.34<br>c=103.49                     | α=90.0<br>β=90.0<br>γ=90.0                       | [6]        |
| 7      | 7CWB                         | Viral Protein        | X-ray        | 1.90              | 0.257/0.218                         | C 1 2 1                                        | 3-Clpro /A/306                             | PHENIX                | a=114.0<br>b=53.50<br>c=45.00                       | α=90.0<br>β=102.0<br>γ=90.0                      | [7]        |

|    |      |                             |       |      |             |         |                |        |                                |                                                  |      |
|----|------|-----------------------------|-------|------|-------------|---------|----------------|--------|--------------------------------|--------------------------------------------------|------|
| 8  | 7JR3 | Hydrolase                   | X-ray | 1.55 | 0.183/0.159 | C 1 2 1 | 3-Clpro/A/306  | PHENIX | a=98.99<br>b=80.99<br>c=51.74  | $\alpha=90.0$<br>$\beta=114.7$<br>$\gamma=90.0$  | [8]  |
| 9  | 7JUN | Hydrolase                   | X-ray | 2.30 | 0.220/0.185 | C 1 2 1 | 3-Clpro /A/306 | nCNS   | a=114.92<br>b=54.68<br>c=45.21 | $\alpha=90.0$<br>$\beta=101.46$<br>$\gamma=90.0$ | [9]  |
| 10 | 7JVZ | Viral Protein,<br>Hydrolase | X-ray | 2.50 | 0.217/0.172 | C 1 2 1 | 3-Clpro /A/306 | REFMAC | a=117.6<br>b=55.4<br>c=45.6    | $\alpha=90.0$<br>$\beta=100.5$<br>$\gamma=90.0$  | [10] |
| 11 | 7KPH | Viral Protein               | X-ray | 1.46 | 0.181/0.167 | C 1 2 1 | 3-Clpro /A/306 | PHENIX | a=112.99<br>b=52.84<br>c=44.74 | $\alpha=90.0$<br>$\beta=102.8$<br>$\gamma=90.0$  | [11] |

---

**Table S2.** Conserved water molecules (W1, W2 and W3) at catalytic region of Mpro protein and normalized B-factors with SASA values and crystallographic structural parameters (c.s.p) of those water molecules in ligand free X-ray structures.

| <i>Water ID</i> | <b>PDB ID</b> | <b>Water molecule</b> | <b>Normalized B-factor (<math>B_{Norm}</math>) (<math>\text{\AA}^2</math>)</b> | <b>SASA (<math>\text{\AA}^2</math>)</b> | <b>Crystallographic Structural parameters (c.s.p.)</b> |                             |                        |                                       |
|-----------------|---------------|-----------------------|--------------------------------------------------------------------------------|-----------------------------------------|--------------------------------------------------------|-----------------------------|------------------------|---------------------------------------|
|                 |               |                       |                                                                                |                                         | <i>Mean B-factor of Protein</i> $\langle Bi \rangle$   | <i>Matthews coefficient</i> | <i>Solvent content</i> | <i>Ratio</i> ( $N_{PROT} / N_{HOH}$ ) |
| W1              | 6YB7          | W639                  | 5.07                                                                           | 2.6                                     | 16.87                                                  | 1.91                        | 35.50                  | 5.34                                  |
|                 | 6Y84          | W615                  | 2.70                                                                           | 0.0                                     | 18.98                                                  | 1.92                        | 35.89                  | 6.00                                  |
|                 | 7ALH          | W573                  | 0.95                                                                           | 20.4                                    | 33.22                                                  | 2.03                        | 39.32                  | 19.43                                 |
|                 | 7ALI          | W563                  | 0.42                                                                           | 19.5                                    | 28.58                                                  | 2.00                        | 38.41                  | 17.08                                 |
|                 | 7BRO          | W499                  | 0.63                                                                           | 17.6                                    | 31.12                                                  | 2.01                        | 38.70                  | 19.04                                 |
|                 | 7JR3          | W484                  | 1.52                                                                           | 2.1                                     | 27.41                                                  | 2.78                        | 55.82                  | 7.10                                  |
|                 | 7KPH          | W629                  | 1.12                                                                           | 1.1                                     | 24.40                                                  | 1.93                        | 36.11                  | 14.71                                 |
| W2              | 6YB7          | W864                  | 3.77                                                                           | 24.9                                    | 16.87                                                  | 1.91                        | 35.50                  | 5.34                                  |
|                 | 6Y84          | W800                  | 3.89                                                                           | 19.3                                    | 18.98                                                  | 1.92                        | 35.89                  | 6.00                                  |
|                 | 7KPH          | W691                  | 2.24                                                                           | 27.4                                    | 24.40                                                  | 1.93                        | 36.11                  | 14.71                                 |
| W3              | 7C2Y          | W346                  | -0.78                                                                          | 0.0                                     | 33.56                                                  | 2.83                        | 56.48                  | 20.93                                 |
|                 | 7CWB          | W441                  | -1.20                                                                          | 0.0                                     | 42.62                                                  | 1.98                        | 38.01                  | 21.37                                 |
|                 | 7JUN          | W409                  | -1.54                                                                          | 0.0                                     | 39.97                                                  | 2.06                        | 40.25                  | 35.87                                 |
|                 | 7JVZ          | W429                  | -0.78                                                                          | 0.0                                     | 70.83                                                  | 2.16                        | 43.03                  | 51.45                                 |

Abbreviation, SASA, Solvent accessible surface area,  $N_{PROT}$ , Number of atoms in protein,  $N_{HOH}$ , Number of atoms in solvent.

**Table S3.** Interactions of ligand HCQ and its structural analogs with the residues of Mpro protein and their binding energies in molecular docking studies.

| S.no. | Ligand ID<br>(Name)                 | H-bonding interaction<br>(distances within 3.50 Å)                                                                                             | Short contacts<br>(distances between<br>3.50 to 4.50 Å)                                                                                                                               | Binding Free<br>energy<br>(kcal/mol) |
|-------|-------------------------------------|------------------------------------------------------------------------------------------------------------------------------------------------|---------------------------------------------------------------------------------------------------------------------------------------------------------------------------------------|--------------------------------------|
| 1     | DB01611<br>(Hydroxychloroquine)     | <sup>OB</sup> T26, <sup>ND1</sup> H41, <sup>OG</sup> S46                                                                                       | <sup>SG</sup> C145, <sup>NB</sup> E166,<br><sup>OE1</sup> Q189                                                                                                                        | -5.80                                |
| 2     | DB00608<br>(Chloroquine)            | <sup>OG1</sup> T25, <sup>OB</sup> T26, <sup>NB</sup> E166                                                                                      | <sup>ND1</sup> H41, <sup>OB</sup> C44, <sup>OB</sup> H164                                                                                                                             | -5.30                                |
| 3     | DB00353<br>(Methylethylergometrine) | <sup>OB</sup> T24, <sup>OG1</sup> T25,<br><sup>OB</sup> C44, <sup>NB</sup> S46                                                                 | <sup>OB</sup> T45, <sup>ND1</sup> H41,<br><sup>OE1</sup> Q189                                                                                                                         | -8.00                                |
| 4     | DB05039<br>(Indacaterol)            | <sup>OG1</sup> T25, <sup>ND1</sup> H41, <sup>NE2</sup> H41, <sup>NB</sup> G143,<br><sup>OB</sup> H164                                          | <sup>OB</sup> T24, <sup>NB</sup> T25, <sup>OB</sup> T26,<br><sup>SD</sup> M49, <sup>SG</sup> C145                                                                                     | -8.60                                |
| 5     | CHEMBL42527                         | <sup>ND1</sup> H41, <sup>OB</sup> H164                                                                                                         | <sup>NE2</sup> H41, <sup>OB</sup> C44, <sup>OG</sup> S46,<br><sup>OD1</sup> N142, <sup>SG</sup> C145,<br><sup>NB</sup> M165, <sup>OE1</sup> E166                                      | -6.70                                |
| 6     | ZINC44136213                        | <sup>OG1</sup> T25, <sup>OB</sup> F140, <sup>OB</sup> L141, <sup>OB</sup> G143,<br><sup>OG</sup> S144, <sup>SG</sup> C145, <sup>NE2</sup> H163 | <sup>OB</sup> C44, <sup>ND1</sup> H41, <sup>OD1</sup> N142,<br><sup>OB</sup> H164, <sup>NB</sup> M165, <sup>NB</sup> E166                                                             | -6.50                                |
| 7     | ZINC77376915                        | <sup>OB</sup> E166, <sup>OB</sup> H164,<br><sup>ND1</sup> H41, <sup>NE2</sup> H41                                                              | <sup>NB</sup> P168, <sup>OD1</sup> A142,<br><sup>SD</sup> M49, <sup>SG</sup> C145                                                                                                     | -6.90                                |
| 8     | ZINC77520192                        | <sup>OD1</sup> A142, <sup>OB</sup> E166                                                                                                        | <sup>OG1</sup> T25, <sup>ND1</sup> H41,<br><sup>OB</sup> C44, <sup>OB</sup> T45, <sup>NB</sup> S46                                                                                    | -7.10                                |
| 9     | ZINC40444366                        | <sup>OB</sup> C44, <sup>OB</sup> T45,<br><sup>OB</sup> H164                                                                                    | <sup>OG1</sup> T25, <sup>ND1</sup> H41,<br><sup>SD</sup> M49, <sup>SG</sup> C145, <sup>NB</sup> M165,<br><sup>NB</sup> E166                                                           | -6.40                                |
| 10    | ZINC95367069                        | <sup>ND1</sup> H41                                                                                                                             | <sup>NB</sup> V42, <sup>OB</sup> E166, <sup>OB</sup> R188,<br><sup>OE1</sup> Q189, <sup>NB</sup> T190, <sup>NE2</sup> Q192                                                            | -7.40                                |
| 11    | ZINC28706440                        | <sup>OB</sup> C44, <sup>NB</sup> E166, <sup>OG</sup> S144, <sup>SG</sup> C145                                                                  | <sup>OG1</sup> T25, <sup>OB</sup> T45, <sup>ND1</sup> H41,<br><sup>NB</sup> C44, <sup>OG</sup> S46, <sup>SD</sup> M49,<br><sup>OB</sup> L141, <sup>NE2</sup> H163, <sup>OB</sup> E166 | -5.60                                |
| 12    | ZINC44136210                        | <sup>OB</sup> T26, <sup>OB</sup> E166, <sup>NE2</sup> Q192,<br><sup>OB</sup> T190, <sup>OB</sup> R188                                          | <sup>OG1</sup> T25, <sup>ND1</sup> H41, <sup>OB</sup> C44,<br><sup>SG</sup> C145, <sup>NB</sup> G143, <sup>NB</sup> P168                                                              | -6.70                                |
| 13    | ZINC01706244                        | <sup>OB</sup> C44, <sup>OB</sup> T45, <sup>SD</sup> M49, <sup>ND1</sup> H41,<br><sup>OB</sup> M164                                             | <sup>OG1</sup> T25, <sup>NB</sup> T45, <sup>NB</sup> S46,<br><sup>NE2</sup> H41, <sup>SG</sup> C145, <sup>OD1</sup> N142,<br><sup>OE1</sup> E166                                      | -6.20                                |
| 14    | ZINC95367068                        | <sup>OB</sup> C44, <sup>OB</sup> T45, <sup>SG</sup> C145, <sup>OB</sup> E166,                                                                  | <sup>OG1</sup> T25, <sup>NB</sup> S46,<br><sup>SD</sup> M49, <sup>ND1</sup> H41, <sup>NE2</sup> H41,<br><sup>NB</sup> G143, <sup>OE1</sup> E189                                       | -7.30                                |
| 15    | ZINC40412048                        | <sup>OB</sup> T26, <sup>NB</sup> T26, <sup>NE2</sup> H41, <sup>ND1</sup> H41,                                                                  | <sup>OB</sup> T24, <sup>SD</sup> M49, <sup>SG</sup> C145,<br><sup>OB</sup> H164                                                                                                       | -6.40                                |

**Table S4.** Physicochemical properties of ligand HCQ and its structural analogs obtained from OSIRIS Property Explorer and Swiss ADME program.

| S.No. | LIGAND ID                      | Molecular Formula                                               | OSIRIS Property Explorer |              |                    |              |               |             | Swiss ADME         |            |                       |                         |
|-------|--------------------------------|-----------------------------------------------------------------|--------------------------|--------------|--------------------|--------------|---------------|-------------|--------------------|------------|-----------------------|-------------------------|
|       |                                |                                                                 | cLogP                    | Solubility   | Molweight (gm/mol) | TPSA         | Drug likeness | Drug-score  | Molar Refractivity | Lipinski   | Bioavailability Score | Synthetic Accessibility |
| 1     | <b>DB01611</b><br><b>(HCQ)</b> | <b>C<sub>18</sub>H<sub>26</sub>ClN<sub>3</sub>O</b>             | <b>3.08</b>              | <b>-3.55</b> | <b>335</b>         | <b>48.39</b> | <b>6.54</b>   | <b>0.48</b> | <b>98.57</b>       | <b>YES</b> | <b>0.55</b>           | <b>2.82</b>             |
| 2     | DB00608<br>(Chloroquine)       | C <sub>18</sub> H <sub>26</sub> ClN <sub>3</sub>                | 4.01                     | -4.06        | 319                | 28.16        | 7.39          | 0.25        | 97.41              | YES        | 0.55                  | 2.76                    |
| 3     | DB00353<br>(Methylergometrine) | C <sub>20</sub> H <sub>25</sub> N <sub>3</sub> O <sub>2</sub>   | 1.33                     | -2.51        | 339                | 68.36        | 8.03          | 0.32        | 103.37             | YES        | 0.55                  | 4.36                    |
| 4     | DB05039<br>(Indacaterol)       | C <sub>24</sub> H <sub>28</sub> N <sub>2</sub> O <sub>3</sub>   | 2.81                     | -4.42        | 392                | 81.59        | 2.12          | 0.66        | 116.83             | YES        | 0.55                  | 3.68                    |
| 5     | CHEMBL42527                    | C <sub>24</sub> H <sub>25</sub> Cl <sub>2</sub> N <sub>5</sub>  | 4.63                     | -6.18        | 453                | 61.87        | 1.73          | 0.22        | 132.03             | YES        | 0.55                  | 2.70                    |
| 6     | ZINC44136213                   | C <sub>16</sub> H <sub>20</sub> ClN <sub>3</sub> O <sub>2</sub> | 2.06                     | -3.60        | 321                | 74.25        | 3.20          | 0.49        | 89.06              | YES        | 0.55                  | 2.53                    |
| 7     | ZINC77376915                   | C <sub>19</sub> H <sub>24</sub> ClN <sub>3</sub> O              | 2.95                     | -3.40        | 345                | 28.60        | 4.69          | 0.48        | 106.02             | YES        | 0.55                  | 2.89                    |
| 8     | ZINC77520192                   | C <sub>19</sub> H <sub>24</sub> ClN <sub>3</sub> O              | 3.06                     | -3.84        | 345                | 39.60        | 6.48          | 0.46        | 106.10             | YES        | 0.55                  | 2.53                    |
| 9     | ZINC40444366                   | C <sub>15</sub> H <sub>17</sub> ClN <sub>2</sub> O              | 2.76                     | -3.70        | 276                | 36.36        | 1.79          | 0.46        | 82.17              | YES        | 0.55                  | 2.31                    |
| 10    | ZINC95367069                   | C <sub>19</sub> H <sub>24</sub> ClN <sub>3</sub> O              | 3.06                     | -3.84        | 345                | 39.60        | 5.90          | 0.46        | 106.10             | YES        | 0.55                  | 3.31                    |
| 11    | ZINC28706440                   | C <sub>14</sub> H <sub>18</sub> ClN <sub>3</sub> O              | 1.60                     | -2.97        | 279                | 57.18        | 1.74          | 0.50        | 79.25              | YES        | 0.55                  | 2.01                    |
| 12    | ZINC44136210                   | C <sub>16</sub> H <sub>20</sub> ClN <sub>3</sub> O <sub>2</sub> | 2.06                     | -3.60        | 321                | 74.25        | 3.20          | 0.49        | 89.06              | YES        | 0.55                  | 2.53                    |
| 13    | ZINC01706244                   | C <sub>16</sub> H <sub>22</sub> ClN <sub>3</sub> O              | 2.34                     | -3.45        | 307                | 57.18        | 1.75          | 0.47        | 88.90              | YES        | 0.55                  | 2.24                    |
| 14    | ZINC95367068                   | C <sub>19</sub> H <sub>24</sub> ClN <sub>3</sub> O              | 3.06                     | -3.84        | 345                | 39.60        | 5.90          | 0.46        | 106.10             | YES        | 0.55                  | 3.31                    |
| 15    | ZINC40412048                   | C <sub>14</sub> H <sub>15</sub> ClN <sub>2</sub> O              | 2.56                     | -3.65        | 262                | 36.36        | 5.02          | 0.50        | 77.36              | YES        | 0.55                  | 2.22                    |

Abbreviation, cLogP, calculated Log P; Molweight, Molecular weight; TPSA, topological polar surface area

**Table S5.** Toxicity properties of ligand HCQ and its structural analogs obtained from OSIRIS Property Explorer.

| S.No. | Ligand Id                              | Toxicity Risks |             |             |                        |
|-------|----------------------------------------|----------------|-------------|-------------|------------------------|
|       |                                        | Mutagenic      | Tumorigenic | Irritant    | Reproductive effective |
| 1     | <b>DB01611</b><br>(Hydroxychloroquine) | <b>High</b>    | Low         | Low         | Low                    |
| 2     | DB00608<br>(Chloroquine)               | <b>High</b>    | Low         | <b>High</b> | Low                    |
| 3     | DB00353<br>(Methylethergometrine)      | Low            | Low         | <b>High</b> | <b>High</b>            |
| 4     | DB05039<br>(Indacaterol)               | Low            | Low         | Low         | Low                    |
| 5     | CHEMBL42527                            | <b>High</b>    | Low         | Low         | Low                    |
| 6     | ZINC44136213                           | <b>High</b>    | Low         | Low         | Low                    |
| 7     | ZINC77376915                           | <b>High</b>    | Low         | Low         | Low                    |
| 8     | ZINC77520192                           | <b>High</b>    | Low         | Low         | Low                    |
| 9     | ZINC40444366                           | <b>High</b>    | Low         | Low         | Low                    |
| 10    | ZINC95367069                           | <b>High</b>    | Low         | Low         | Low                    |
| 11    | ZINC28706440                           | <b>High</b>    | Low         | Low         | Low                    |
| 12    | ZINC44136210                           | <b>High</b>    | Low         | Low         | Low                    |
| 13    | ZINC01706244                           | <b>High</b>    | Low         | Low         | Low                    |
| 14    | ZINC95367068                           | <b>High</b>    | Low         | Low         | Low                    |
| 15    | ZINC40412048                           | <b>High</b>    | Low         | Low         | Low                    |

**Table S6:** The short contacts (within 4.50 Å) of ligand HCQ, indactero1, and ZINC28706440 with Mpro protein in MD structures

| S.no | Ligands      | H-bond Interaction (within 4.5 Å)                                                                                         |
|------|--------------|---------------------------------------------------------------------------------------------------------------------------|
| 1    | HCQ          | <sup>NE2</sup> H41, <sup>SG</sup> C145, <sup>OB</sup> H164, <sup>OB</sup> V186, <sup>NB</sup> R188, <sup>OE1</sup> Q189   |
| 2    | Indactero1   | <sup>ND1</sup> H41, <sup>OG1</sup> S46, <sup>OE1</sup> E47, <sup>ND1</sup> N142, <sup>NE2</sup> Q189                      |
| 3    | ZINC28706440 | <sup>NE2</sup> H41, <sup>NE2</sup> H163, <sup>NB</sup> H164, <sup>OE1</sup> E166, <sup>OB</sup> R188, <sup>NE2</sup> Q189 |

**Table S7:** Ligands from molecular docking and MD-Simulated structures not occupied the W1, W2, and W3 water molecules in the 6YB7 and 7CWB crystal structures. Distances (Å) between the atom of each ligand to W1, W2, and W3 water molecules of 6YB7 and 7CWB crystal structures are mentioned.

| S.No. | Ligand       | Structures    | Distances (Å) between an atom of ligand to W1 and W2 position of 6YB7 and W3 position of 7CWB crystal structure |                                   |              |
|-------|--------------|---------------|-----------------------------------------------------------------------------------------------------------------|-----------------------------------|--------------|
|       |              |               | W1<br>(W639)                                                                                                    | W2<br>(W864)                      | W3<br>(W441) |
| 1     | HCQ          | MD Simulation | *-                                                                                                              | C8 <sup>HCQ</sup> (1.23)          | -            |
|       |              | Docking       | -                                                                                                               | C11 <sup>HCQ</sup> (1.44)         | *NA          |
| 2     | Indacaterol  | MD Simulation | -                                                                                                               | -                                 | NA           |
|       |              | Docking       | -                                                                                                               | C22 <sup>Indacaterol</sup> (0.82) | NA           |
| 3     | ZINC28706440 | MD Simulation | -                                                                                                               | -                                 | NA           |
|       |              | Docking       | O1 <sup>ZINC28706440</sup> (0.72)                                                                               | C2 <sup>ZINC28706440</sup> (0.97) | NA           |

\*'-', Not Occupied, NA, Not Available



## SUPPLEMENTARY FIGURES

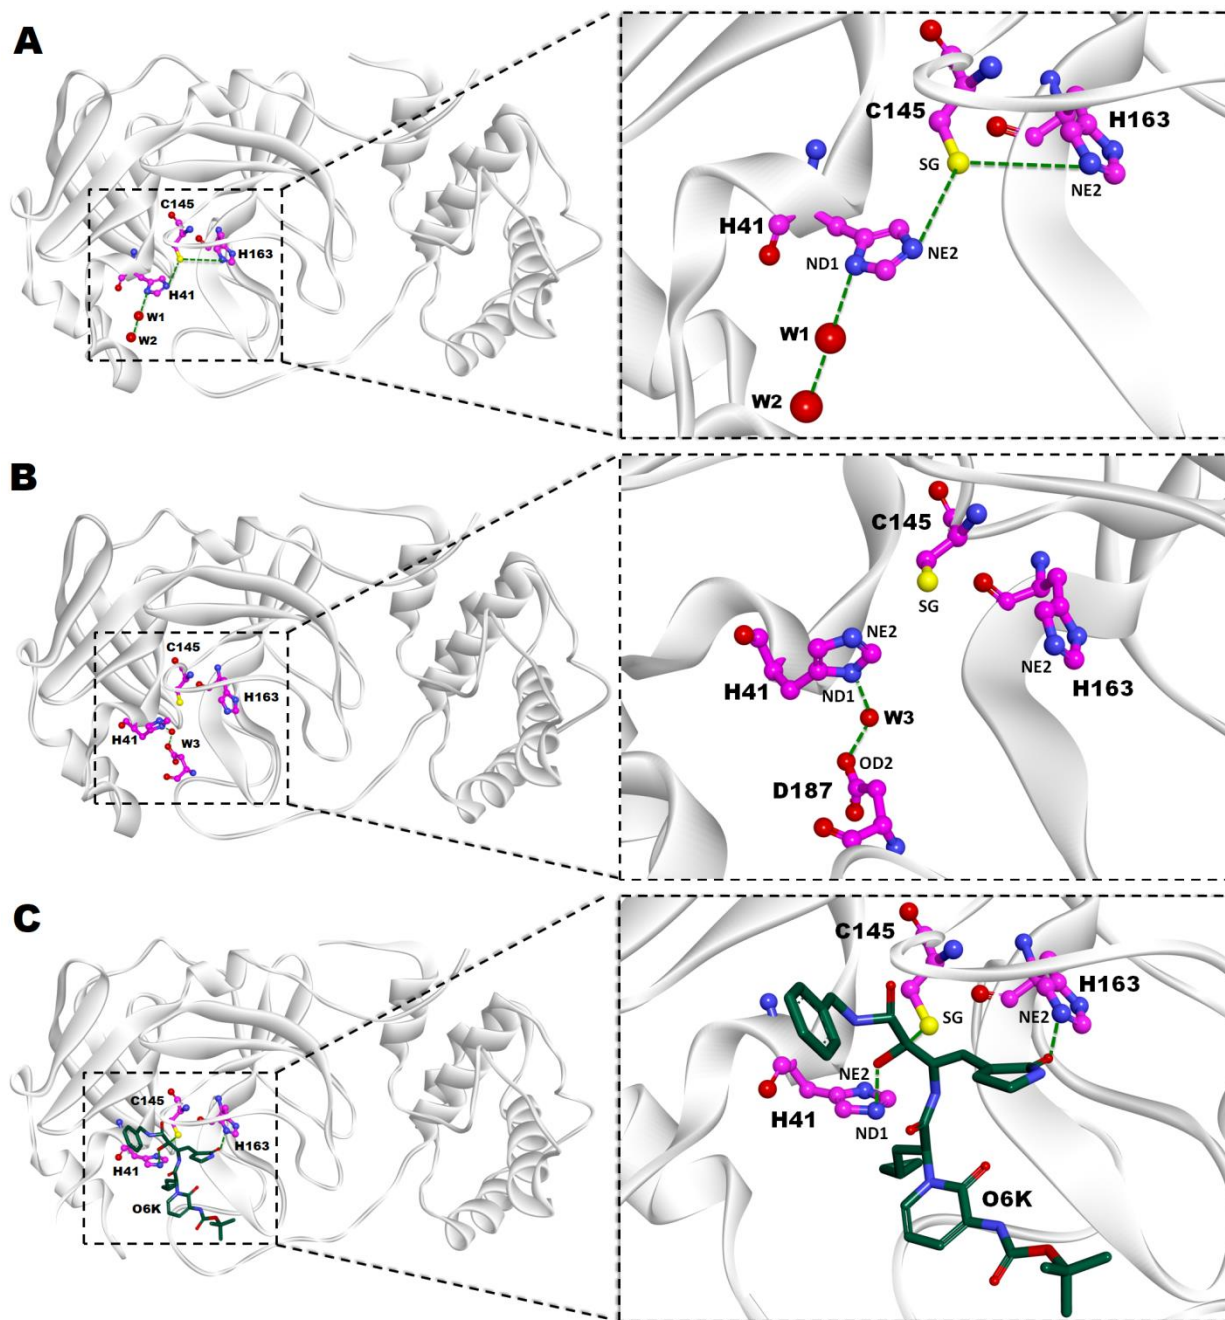

**Fig. S1:** H-bonding interactions between catalytic residues (His41, Cys145, and His163) of Mpro and water molecules (W1, W2, and W3) are shown as dotted lines in (A) native conformation of PDB ID: 6YB7, (B) native conformation of PDB ID: 7JUN, and (C) ligand-bound conformation of PDB ID: 6Y2F. Upper right panel indicates the recognition of W2---W1---His41---Cys145---His163. Middle panel indicates the recognition of D187---W3---His41. Lower right panel represents the interactions of His41---ligand (PDB name: O6K) ---Cys145 and His41---ligand (PDB name: O6K)---His163 at ligand-binding pocket in crystal structure of 6Y2F.

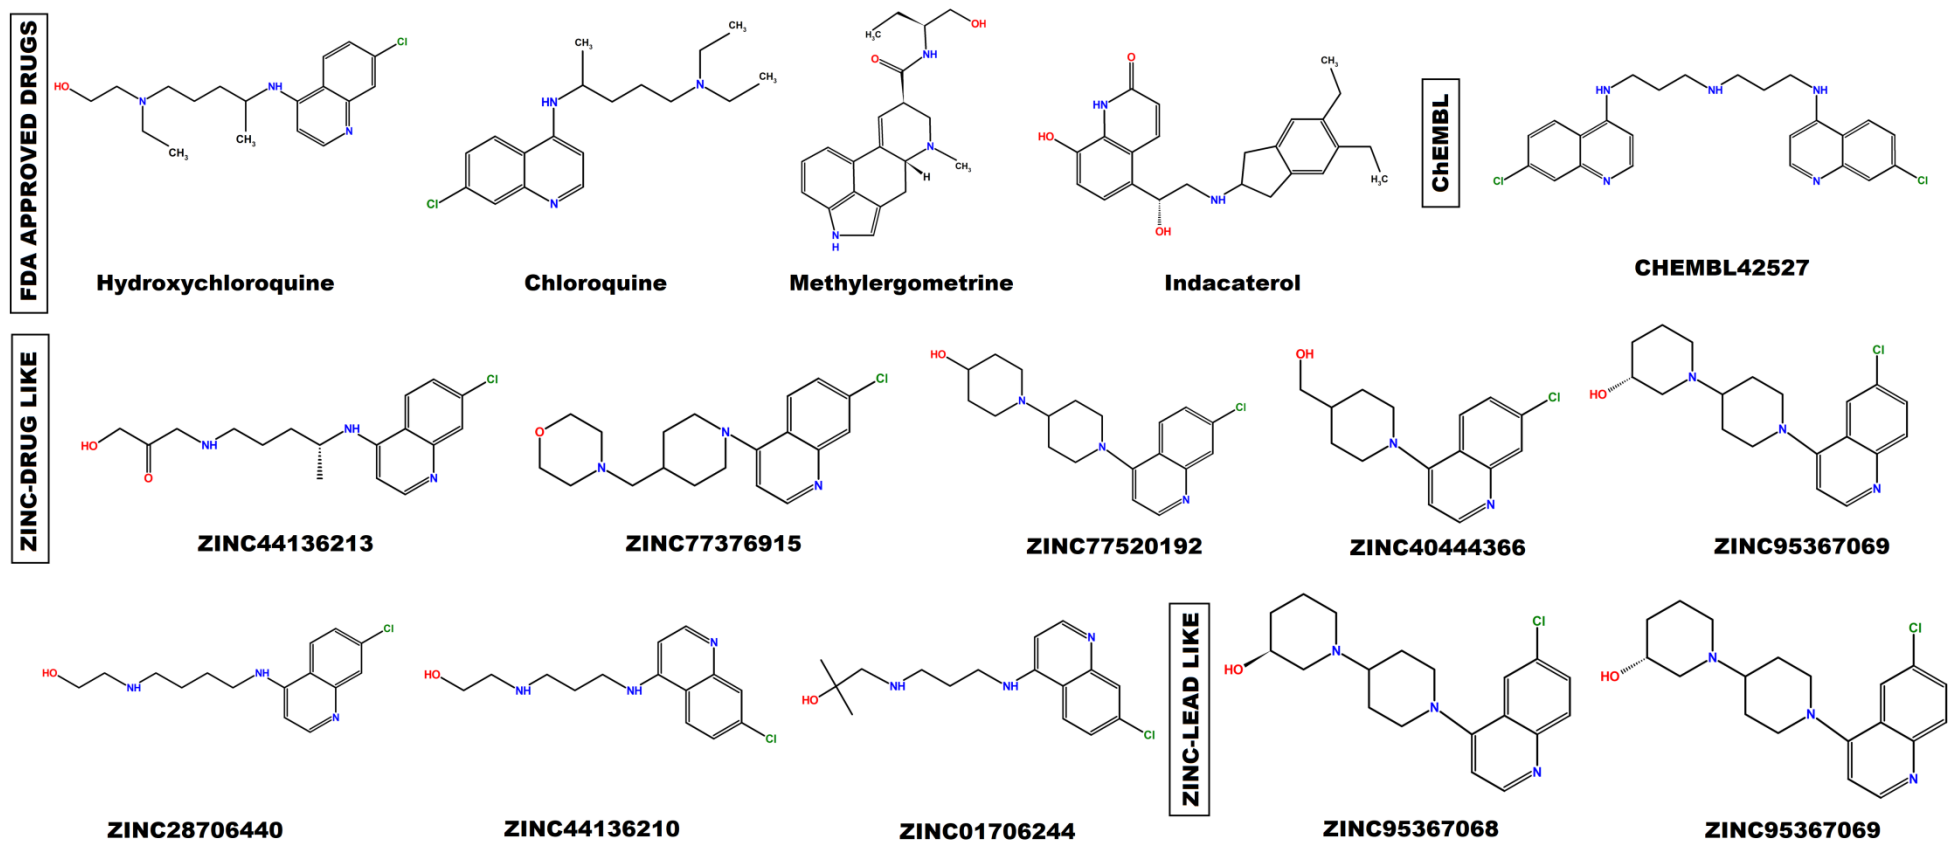

**Fig. S2:** Schematic presentations of the chemical structures of Hydroxychloroquine and its analogs that were obtained from FDA approved drugs, ChEMBL, Zinc-Drug like, and Zinc-Lead like databases.

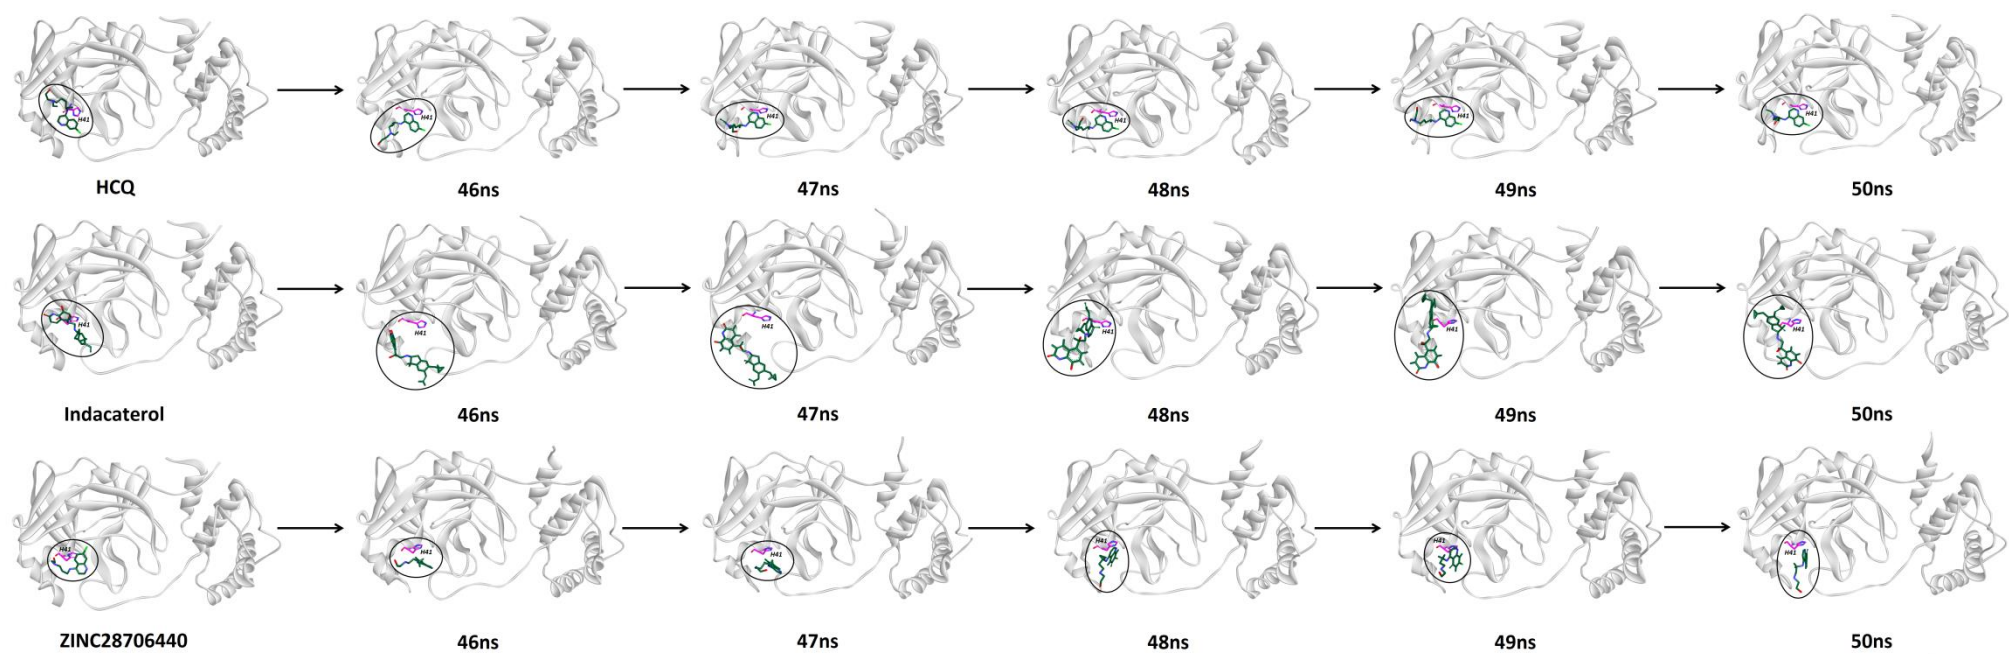

**Fig. S3:** Conformational change and binding position of each ligand with respect to His41 during MD simulation of HCQ (upper panel), Indacaterol (middle), and ZINC28706440 (lower panel) bound-MD structures in 6YB7.

## References:

1. Owen C.D., Lukacik P., Strain-Damerell C.M., Douangamath A., Powell A.J., Fearon D., et al., SARS-CoV-2 main protease with unliganded active site (2019-nCoV, coronavirus disease 2019, COVID-19), Worldwide Protein Data Bank, (2020), <http://dx.doi.org/10.2210/pdb6yb7/pdb>.
2. Owen C.D., Lukacik P., Strain-Damerell C.M., Douangamath A., Powell A.J., Fearon D., et al., SARS-CoV-2 main protease with unliganded active site (2019-nCoV, coronavirus disease 2019, COVID-19), Worldwide Protein Data Bank, (2020), <http://dx.doi.org/10.2210/pdb6y84/pdb>.
3. Costanzi E., Demitri N., Giabbai B., Heroux A., Storici P., Crystal structure of the main protease (3CLpro/Mpro) of SARS-CoV-2 at 1.65Å resolution (spacegroup C2), Worldwide Protein Data Bank, (2020), <http://dx.doi.org/10.2210/pdb7alh/pdb>.
4. Costanzi E., Demitri N., Giabbai B., Heroux A., Storici P., Crystal structure of the main protease (3CLpro/Mpro) of SARS-CoV-2 at 1.65Å resolution (spacegroup P2(1)), Worldwide Protein Data Bank, 2020, <http://dx.doi.org/10.2210/pdb7ali/pdb>.
5. Fu L.F., Crystal structure of the 2019-nCoV main protease, Worldwide Protein Data Bank, 2020, <http://dx.doi.org/10.2210/pdb7bro/pdb>.
6. Zhou X.L., Zhong F.L., Lin C., Zhou H., Hu X.H., Wang Q.S., et al., The crystal structure of COVID-2019 main protease in the apo state, Worldwide Protein Data Bank, 2020, <http://dx.doi.org/10.2210/pdb7c2y/pdb>.
7. DeMirci H., Ambient-Temperature Serial Femtosecond X-ray Crystal structure of SARS-CoV-2 Main Protease at 1.9 Å Resolution (C121), Worldwide Protein Data Bank, 2020, <http://dx.doi.org/10.2210/pdb7cwb/pdb>.
8. De Oliveira R.R., Nascimento A.F.Z., Zeri A.C.M., Trivella D.B.B, SARS-CoV-2 3CL protease crystallized under reducing conditions, Worldwide Protein Data Bank, 2020, <http://dx.doi.org/10.2210/pdb7jr3/pdb>.
9. Kneller D.W., Phillips G., Weiss K.L., Pant S., Zhang Q., O'Neill H.M., Coates L., Kovalevsky A., Unusual zwitterionic catalytic site of SARS-CoV-2 main protease revealed by neutron crystallography, Journal of Biological Chemistry, 295(2020),17365-73, <https://doi.org/10.1074/jbc.AC120.016154>.
10. Worldwide Protein Data Bank, <http://dx.doi.org/10.2210/pdb7jvz/pdb>.
11. Noske G.D., Nakamura A.M., Gawriljuk V.O., Lima G.M.A., Zeri A.C.M., Nascimento A.F.Z., et al., SARS-CoV-2 Main Protease in mature form, Worldwide Protein Data Bank, 2020, <http://dx.doi.org/10.2210/pdb7kph/pdb>.
